**Corrigendum to: Zhongfan Zhu & Jie Dou (2018) Current status of reclaimed water in China: an overview. *Journal of Water Reuse and Desalination* 8 (3): 293–307.**  
<https://doi.org/10.2166/wrd.2018.070>

**Jie Dou**  
Public Works Research Institute (PWRI),  
Tsukuba,  
Japan

The author regrets that the author affiliation in the original article was stated incorrectly and should be shown as above.

---

This is an Open Access article distributed under the terms of the Creative Commons Attribution Licence (CC BY 4.0), which permits copying, adaptation and redistribution, provided the original work is properly cited (<http://creativecommons.org/licenses/by/4.0/>).

doi: 10.2166/wrd.2019.000
